# Supplementary material for: Composite cyclodextrin–calcium carbonate porous microparticles and modified multilayer capsules: novel carriers for encapsulation of hydrophobic drugs
Source: Royal Society of Chemistry journal article supplement (doi:10.1039/c3tb20192a), 2013-01-01
Supplement: c3tb20192a.pdf [file c3tb20192a.pdf]

## Electronic Supporting Information (ESI)

### Composite Cyclodextrin-Calcium Carbonate Porous Microparticles and Modified Multilayer Capsules: Novel Carriers for Encapsulation of Hydrophobic Drugs

Rajendra Kurapati,<sup>a</sup> and Ashok M Raichur<sup>\*ab</sup>

<sup>a</sup> Department of Materials Engineering, Indian Institute of Science, Bangalore 560012, India Fax: +91-80-23600472; Tel: +91-80-22933238; E-mail: amr@materials.iisc.ernet.in

<sup>b</sup> Department of Applied Chemistry, University of Johannesburg, P.O. Box 17011 Doornfontein 2028, South Africa

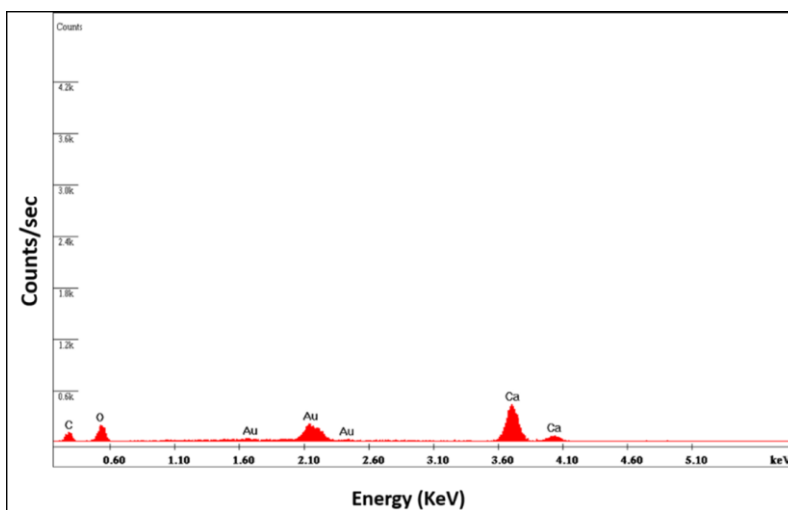

Figure S1: The EDS spectrum of hybrid CD-CaCO<sub>3</sub> microparticles.

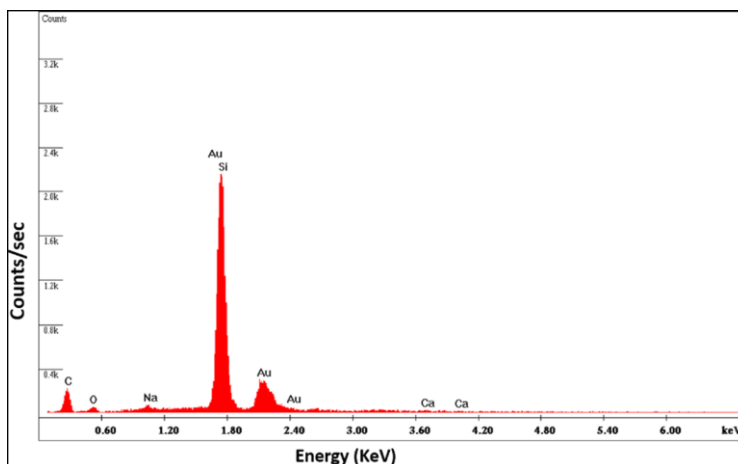

Figure S2: The EDS spectrum of CDs-modified hollow capsules after dissolution of the core.
